# Supplementary material for: Different knockout genotypes of OsIAA23 in rice using CRISPR/Cas9 generating different phenotypes
Source: PubMed Central journal article supplement (PMC6586719; doi:10.1007/s11103-019-00871-5), 2019-04-19

Fig.S1 The mutation screening results of the Kasalath (A) and Wuyung24 (B) mutants.

### A. Mutantions in Kasalath mutants

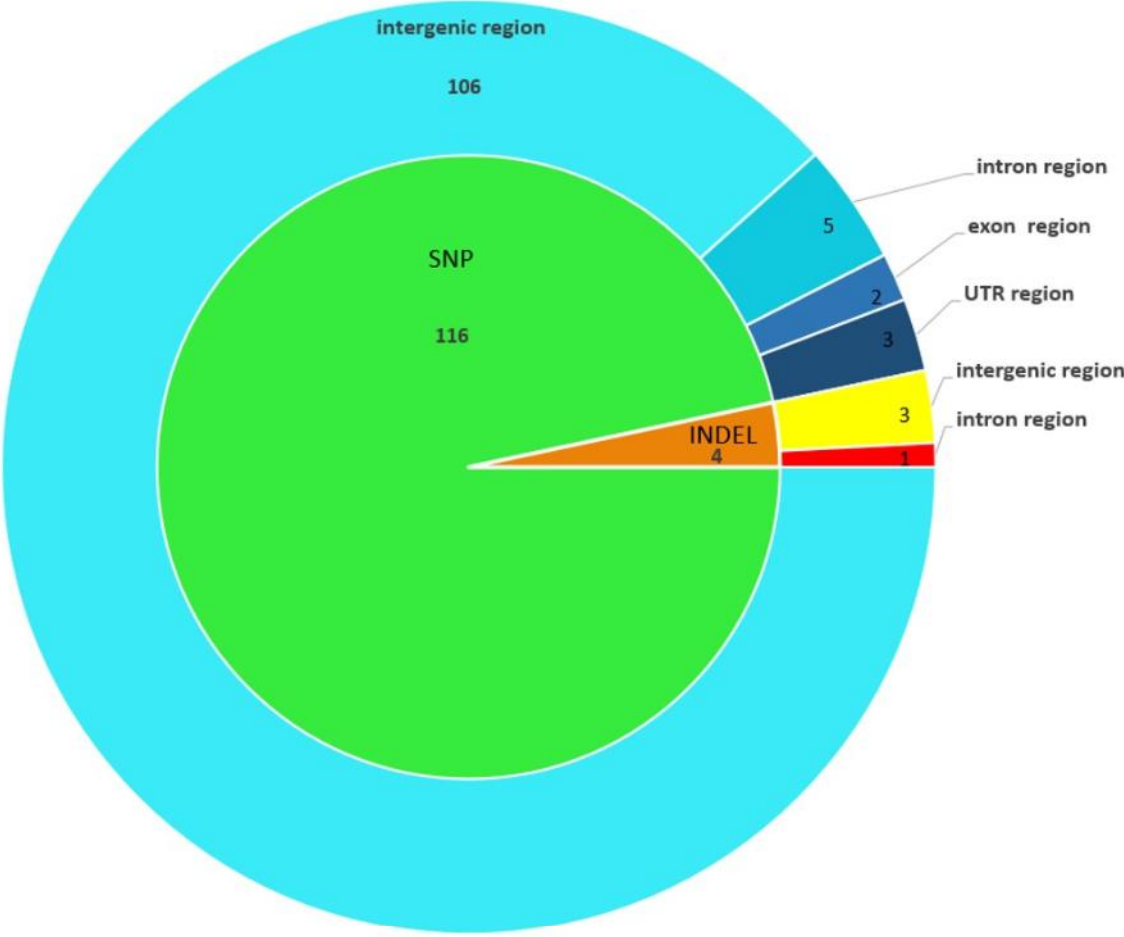

### B. Mutantions in Wuyunjing24 mutants

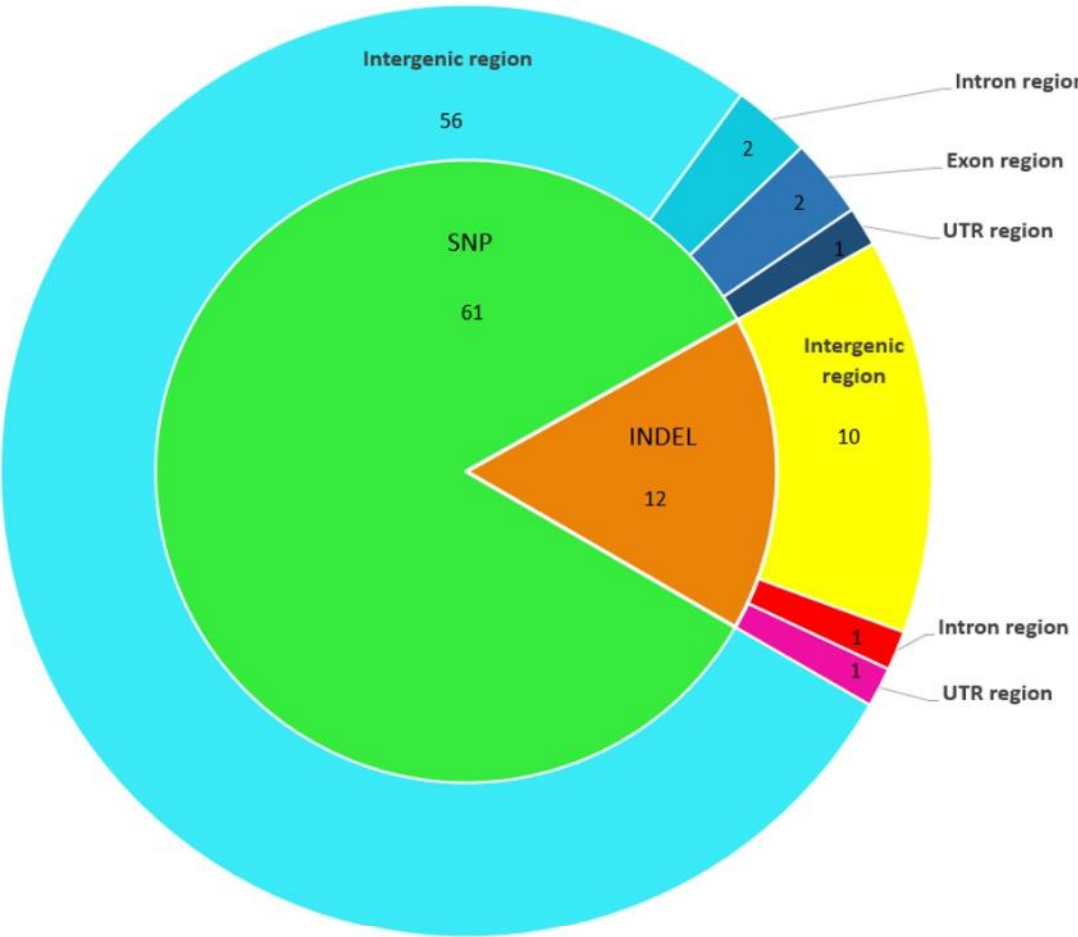

Os06t0597000-01

Fig.S2 Diagram of splice junctions of OsIAA23 predicted from the genome file of *O. sativa* (IRGSP1.0).

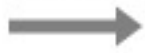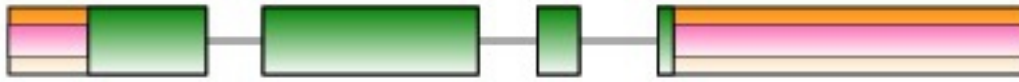

Os06t0597000-02

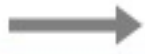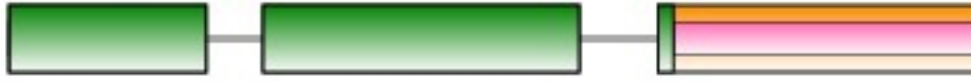

Junc-chr06\_23502673\_23502763-5833-=-

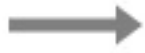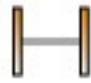

Junc-chr06\_23502824\_23502943-8312-=-

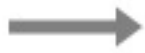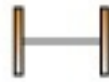

Junc-chr06\_23502267\_23502353-2328-=-

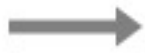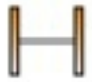

Junc-chr06\_23502684\_23502763-2-d\_-2\_11

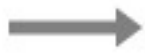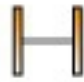

Junc-chr06\_23502686\_23502763-7-d\_-1\_13

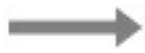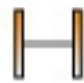

Junc-chr06\_23502093\_23502650-1-b

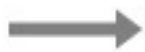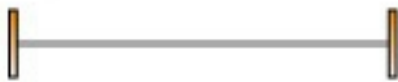

Supplement: 11103_2019_871_MOESM1_ESM.pdf [file 11103_2019_871_MOESM1_ESM.pdf]
